## Expression of Concern

# Expression of Concern: Alamandine attenuates hepatic fibrosis by regulating autophagy induced by NOX4-dependent ROS

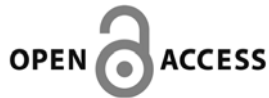

The Editorial Office has been made aware of potential issues surrounding the scientific validity of this paper, hence has issued an expression of concern to notify readers whilst the Editorial Office investigates.

Downloaded from <http://port.silverchair.com/clinsci/article-pdf/134/13/1675/887650/CS-2019-1235-EOC.pdf> by guest on 19 April 2024

Version of Record published:  
06 July 2020
